# Supplementary material
Source: PubMed Central journal article supplement (PMC7760473)
Supplement: oc0c00742_si_001.pdf [file oc0c00742_si_001.pdf]

-Supplementary information-

**SARS-CoV-2 proteome microarray for mapping COVID-19 antibody**

**interactions at amino acid resolution**

**2 Supplementary Tables**

**5 Supplementary Figures**

## Supplementary Tables

Supplementary Table1. The layout of SARS-COV-2 proteome microarray.

Supplementary Table2 Characteristics of early-stage COVID-19 patients.

|                                            | COVID-19 patients<br>(n=10) | Control patients<br>(n=10) |
|--------------------------------------------|-----------------------------|----------------------------|
| Male                                       | 4 (40.0%)                   | 2 (20.0%)                  |
| Female                                     | 6 (60.0%)                   | 8 (80.0%)                  |
| Age, year                                  | 43.2 (7.0-68.0)             | 37.5 (32.0-57.0)           |
| 2019-nCoV(+)                               | 10 (100%)                   | 0                          |
| FluA-RNA(+)                                | 0                           | 0                          |
| FluB RNA(+)                                | 0                           | 0                          |
| RSV RNA(+)                                 | 0                           | 0                          |
| Exposure history                           | 9 (90.0%)                   | 2 (20.0%)                  |
| Fever                                      | 8 (80.0%)                   | 10 (100.0%)                |
| Headache                                   | 0                           | 2 (20.0%)                  |
| Cough                                      | 4 (40.0%)                   | 3 (30.0%)                  |
| Sputum                                     | 2 (20.0%)                   | 2 (20.0%)                  |
| Myalgia                                    | 1 (10.0%)                   | 1 (10.0%)                  |
| Fatigue                                    | 0                           | 0                          |
| Diarrhoea                                  | 0                           | 0                          |
| Dyspnoea                                   | 2 (20.0%)                   | 0                          |
| Nausea or vomiting                         | 0                           | 0                          |
| Onset of symptom,<br>Median $\pm$ SD, days | 3.0 $\pm$ 5.92              | 2.0 $\pm$ 1.87             |
| Ground-glass opacity                       | 8 (80.0%)                   | 6 (60.0%)                  |
| Bilateral pulmonary<br>infiltration        | 8 (80.0%)                   | 4 (40.0%)                  |

Data are median (IQR) or n (%).

## Supplementary Figures

Blocking with 5% milk

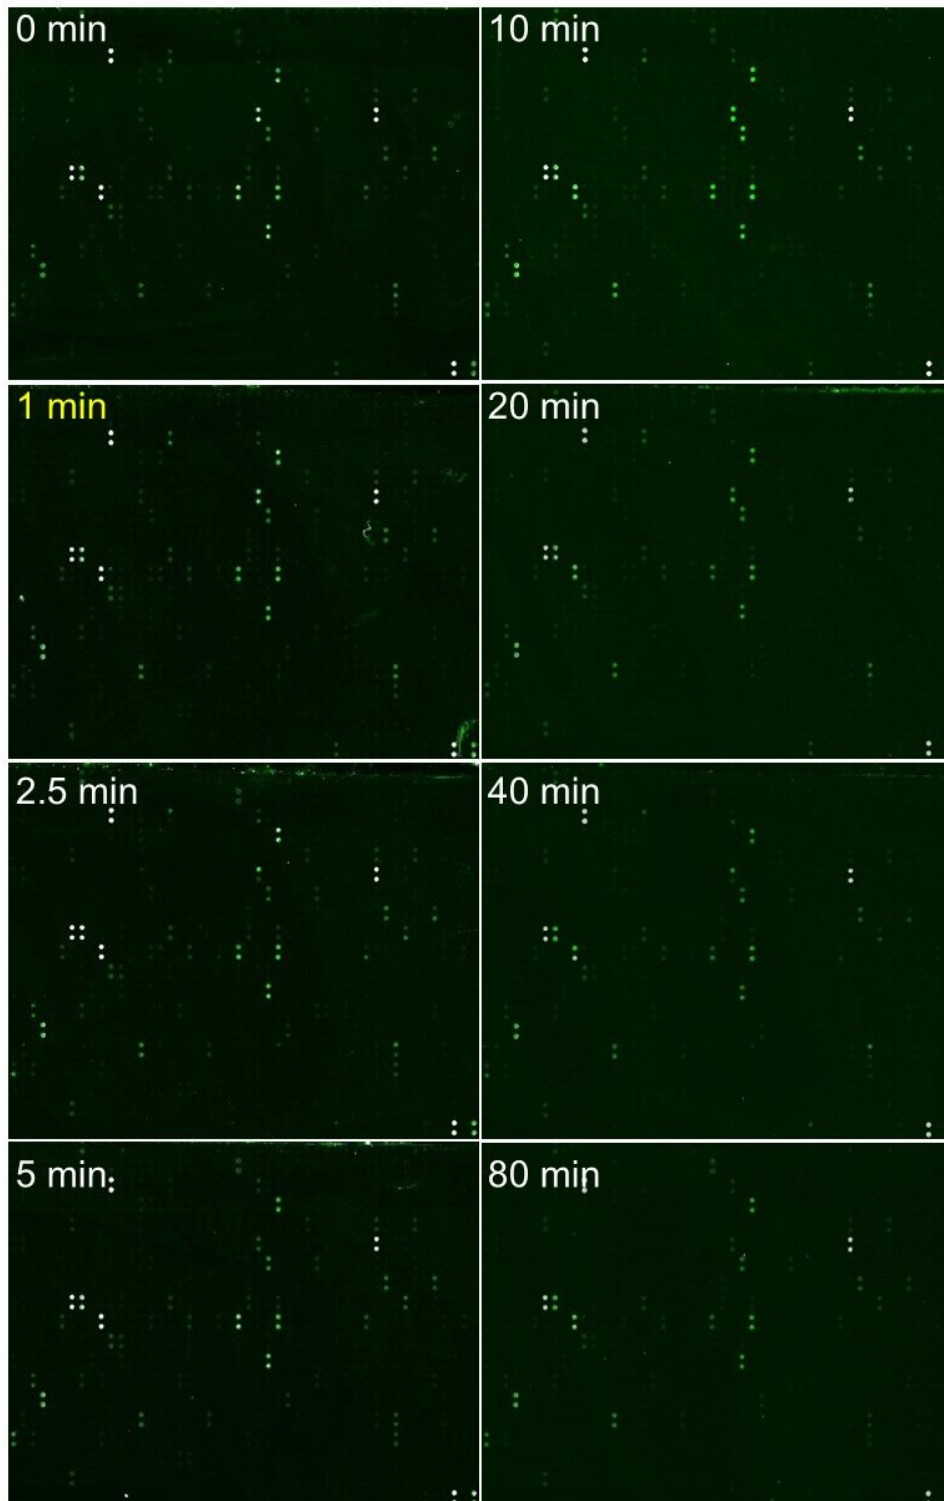

Supplementary Figure 1. A comparison of different blocking incubation lengths on the SARS-COV-2 proteome microarray

Serum incubation

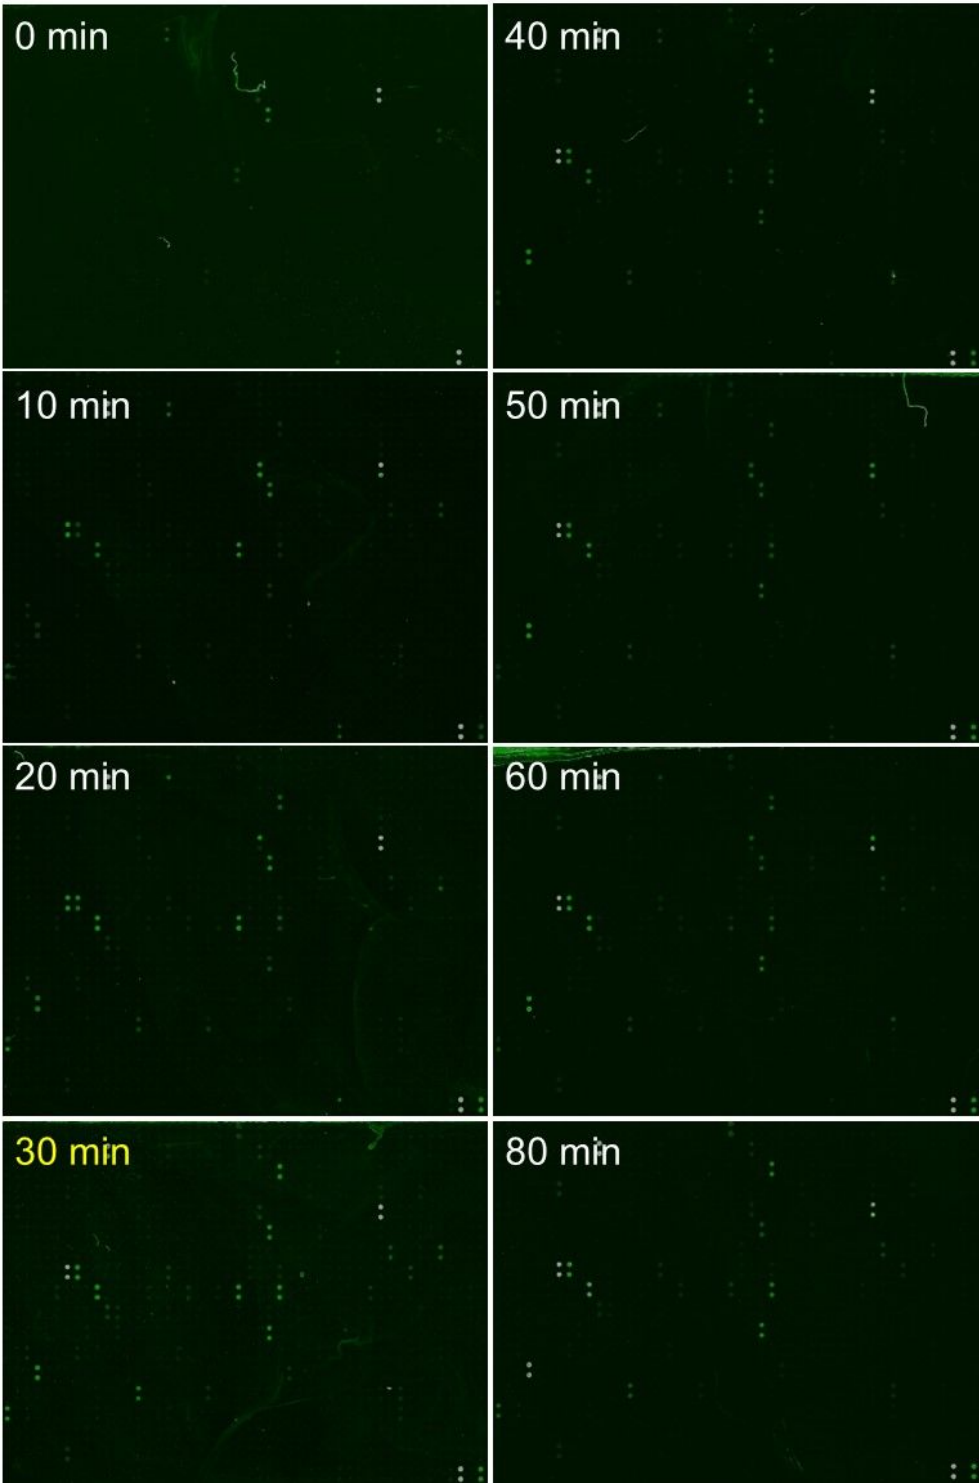

**Supplementary Figure 2. A comparison of different serum sample incubation lengths on the SARS-COV-2 proteome microarray**

Incubation with the detection antibody

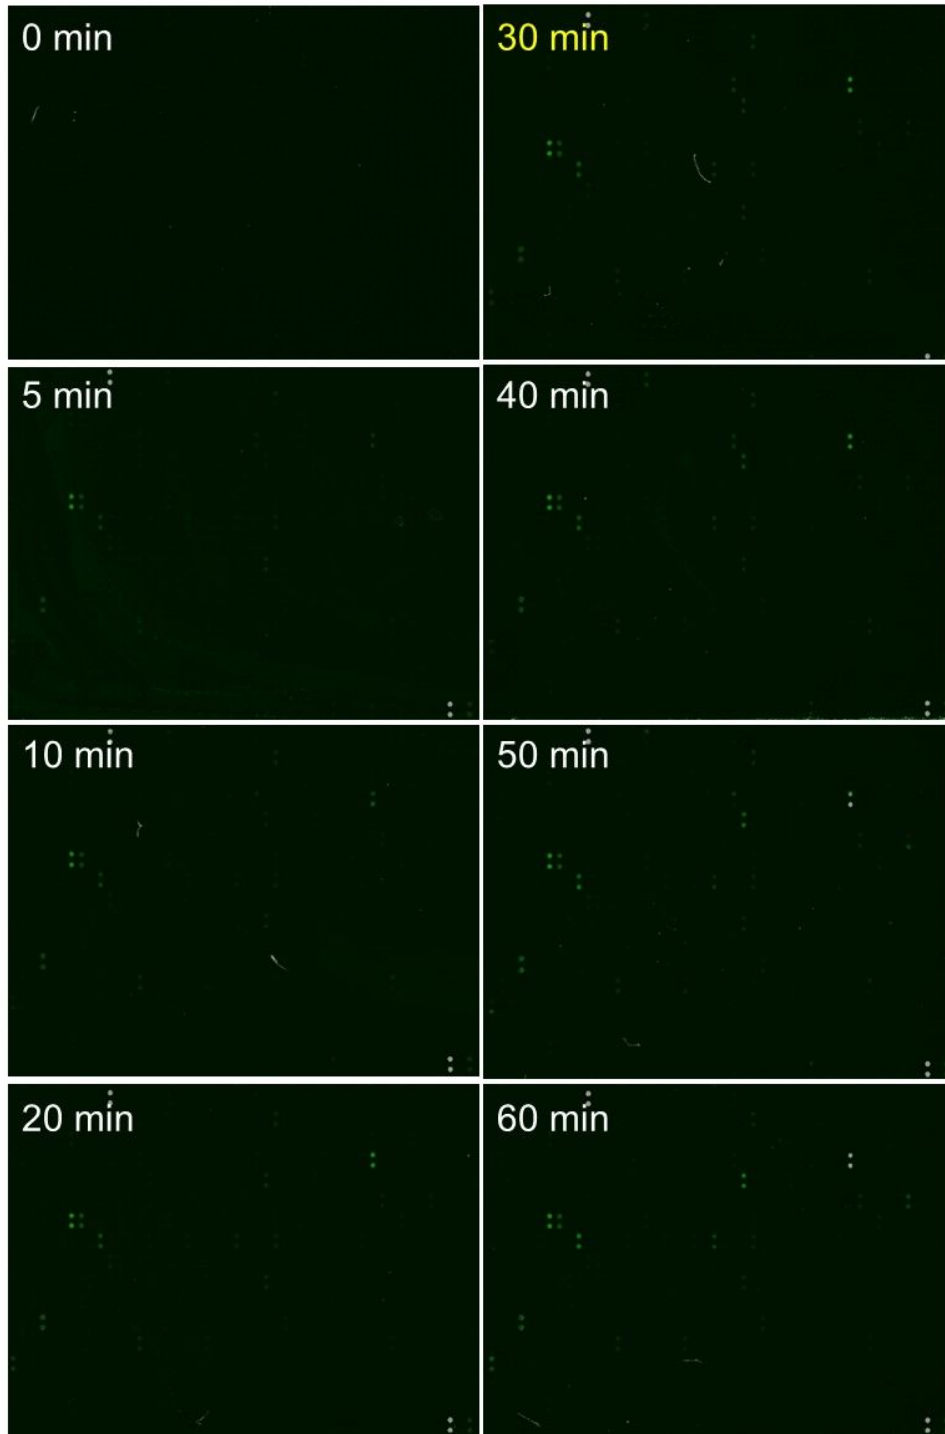

**Supplementary Figure 3. A comparison of different detection antibody incubation lengths on the SARS-COV-2 proteome microarray**

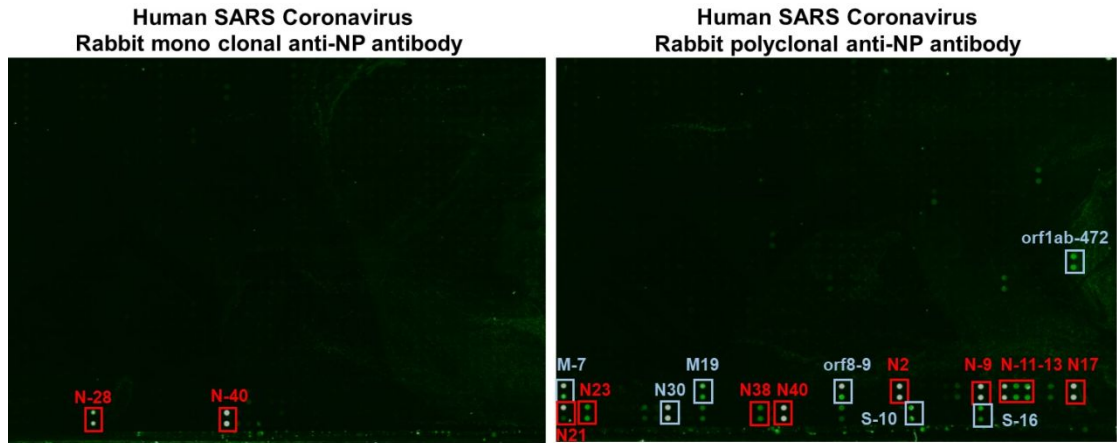

**Supplementary Figure 4. Fluorescent detection image of rabbit anti-SARS-CoV-1 N-protein antibodies using the SARS-CoV-2 proteome microarray. Red = antibody-peptide interactions with peptides from N proteins. Blue = cross-reactive antibody-peptide interactions with peptides from non-N proteins.**

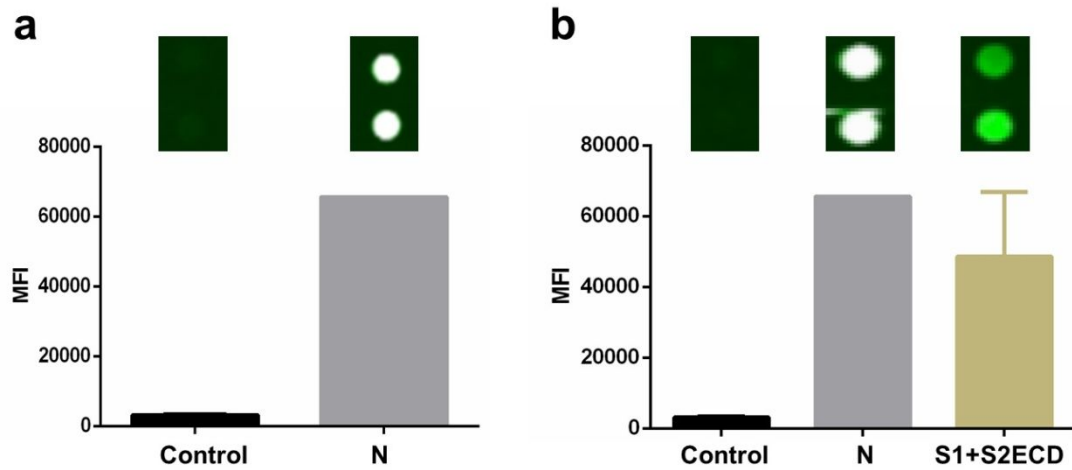

**Supplementary Figure 5. Binding of anti-SARS-CoV-1 antibodies to full-length SARS-CoV-2 proteins.** Interactions of the rabbit (a) monoclonal and (b) polyclonal antibodies with the full-length target proteins. A streptavidin protein was used as the control. S1+S2ECD = S-protein consisting of subunit 1 (S1) and subunit 2 (S2) extracellular domain (ECD).
